# Supplementary material
Source: PubMed Central journal article supplement (PMC4656729)
Supplement: ajcr0005-3042-f7.pdf [file ajcr0005-3042-f7.pdf]

## HOX genes and oral squamous cell carcinoma

**Supplementary Table 1.** Correlation between nuclear or cytoplasmic HOXA13 expression and main clinical features in deep and superficial margin of the lesion

| Crosstabs             |     | HOXA13 Deep nuclear expression |          | P value  | HOXA13 Deep cytoplasmic expression |          | P value  | HOXA13 Superficial nuclear expression |          | P value | HOXA13 Superficial cytoplasmic expression |          | P value |
|-----------------------|-----|--------------------------------|----------|----------|------------------------------------|----------|----------|---------------------------------------|----------|---------|-------------------------------------------|----------|---------|
|                       |     | ≤40                            | 41+      |          | ≤40                                | 41+      |          | ≤40                                   | 41+      |         | ≤40                                       | 41+      |         |
| Median expression     |     | ≤40                            | 41+      |          | ≤40                                | 41+      |          | ≤40                                   | 41+      |         | ≤40                                       | 41+      |         |
| Grading               | G1  | 11                             | 6        | 0.168    | 11                                 | 6        | 0.458    | 8                                     | 9        | 0.274   | 6                                         | 11       | 0.343   |
|                       |     | 64.70588                       | 35.29412 |          | 64.70588                           | 35.29412 |          | 47.05882                              | 52.94118 |         | 35.29412                                  | 64.70588 |         |
|                       | G2  | 29                             | 27       |          | 27                                 | 29       |          | 32                                    | 14       |         | 26                                        | 20       |         |
|                       | G3  | 51.78571                       | 48.21429 | 48.21429 | 51.78571                           | 69.56522 | 30.43478 | 56.52174                              | 43.47826 |         |                                           |          |         |
|                       |     | 19                             | 7        | 15       | 11                                 | 19       | 10       | 15                                    | 14       |         |                                           |          |         |
|                       |     | 73.07692                       | 26.92308 | 57.69231 | 42.30769                           | 65.51724 | 34.48276 | 51.72414                              | 48.27586 |         |                                           |          |         |
| Lymphonode metastasis | N0  | 27                             | 18       | 0.6      | 23                                 | 22       | 0.685    | 26                                    | 14       | 1       | 20                                        | 20       | 0.834   |
|                       |     | 60                             | 40       |          | 51.11111                           | 48.88889 |          | 65                                    | 35       |         | 50                                        | 50       |         |
|                       | N2+ | 32                             | 21       |          | 30                                 | 23       |          | 33                                    | 18       |         | 27                                        | 24       |         |
|                       | I   | 60.37736                       | 39.62264 | 56.60377 | 43.39623                           | 64.70588 | 35.29412 | 52.94118                              | 47.05882 |         |                                           |          |         |
|                       |     | 4                              | 4        | 3        | 5                                  | 4        | 3        | 1                                     | 6        |         |                                           |          |         |
|                       | II  | 50                             | 50       | 37.5     | 62.5                               | 57.14286 | 42.85714 | 14.28571                              | 85.71429 |         |                                           |          |         |
|                       | III | 17                             | 9        | 16       | 10                                 | 16       | 6        | 12                                    | 10       |         |                                           |          |         |
|                       |     | 65.38462                       | 34.61538 | 61.53846 | 38.46154                           | 72.72727 | 27.27273 | 54.54545                              | 45.45455 |         |                                           |          |         |
|                       | IV  | 12                             | 13       | 10       | 15                                 | 12       | 9        | 10                                    | 11       |         |                                           |          |         |
| Stage                 | I   | 48                             | 52       | 40       | 60                                 | 57.14286 | 42.85714 | 47.61905                              | 52.38095 |         |                                           |          |         |
|                       |     | 26                             | 14       | 24       | 16                                 | 27       | 15       | 24                                    | 18       |         |                                           |          |         |
|                       | II  | 65                             | 35       | 60       | 40                                 | 64.28571 | 35.71429 | 57.14286                              | 42.85714 |         |                                           |          |         |
| T                     | 1   | 7                              | 7        | 7        | 7                                  | 8        | 5        | 6                                     | 7        |         |                                           |          |         |
|                       |     | 50                             | 50       | 50       | 50                                 | 61.53846 | 38.46154 | 46.15385                              | 53.84615 |         |                                           |          |         |
|                       | 2   | 28                             | 18       | 27       | 19                                 | 28       | 13       | 21                                    | 20       |         |                                           |          |         |
|                       | 3   | 60.86957                       | 39.13043 | 58.69565 | 41.30435                           | 68.29268 | 31.70732 | 51.21951                              | 48.78049 |         |                                           |          |         |
|                       |     | 12                             | 6        | 8        | 10                                 | 9        | 9        | 9                                     | 9        |         |                                           |          |         |
|                       | 4   | 66.66667                       | 33.33333 | 44.44444 | 55.55556                           | 50       | 50       | 50                                    | 50       |         |                                           |          |         |
| Gender                | F   | 12                             | 9        | 11       | 10                                 | 14       | 6        | 11                                    | 9        |         |                                           |          |         |
|                       |     | 57.14286                       | 42.85714 | 52.38095 | 47.61905                           | 70       | 30       | 55                                    | 45       |         |                                           |          |         |
|                       | M   | 18                             | 13       | 16       | 15                                 | 19       | 8        | 14                                    | 13       |         |                                           |          |         |
|                       | M   | 58.06452                       | 41.93548 | 51.6129  | 48.3871                            | 70.37037 | 29.62963 | 51.85185                              | 48.14815 |         |                                           |          |         |
|                       |     | 41                             | 27       | 37       | 31                                 | 40       | 25       | 33                                    | 32       |         |                                           |          |         |
|                       | <68 | 60.29412                       | 39.70588 | 54.41176 | 45.58824                           | 61.53846 | 38.46154 | 50.76923                              | 49.23077 |         |                                           |          |         |
| Age                   | <68 | 31                             | 20       | 29       | 22                                 | 34       | 16       | 27                                    | 23       |         |                                           |          |         |
|                       |     | 60.78431                       | 39.21569 | 56.86275 | 43.13725                           | 68       | 32       | 54                                    | 46       |         |                                           |          |         |
|                       | >68 | 28                             | 20       | 24       | 24                                 | 25       | 17       | 20                                    | 22       |         |                                           |          |         |
|                       |     | 58.33333                       | 41.66667 | 50       | 50                                 | 59.52381 | 40.47619 | 47.61905                              | 52.38095 |         |                                           |          |         |

## HOX genes and oral squamous cell carcinoma

|               |         |          |          |       |          |          |       |          |          |       |          |          |       |
|---------------|---------|----------|----------|-------|----------|----------|-------|----------|----------|-------|----------|----------|-------|
| Chemotherapy  | No      | 30       | 18       | 1     | 29       | 19       | 0.22  | 33       | 10       | 0.273 | 23       | 20       | 0.624 |
|               |         | 62.5     | 37.5     |       | 60.41667 | 39.58333 |       | 76.74419 | 23.25581 |       | 53.48837 | 46.51163 |       |
|               | Yes     | 16       | 9        |       | 11       | 14       |       | 16       | 10       |       | 12       | 14       |       |
|               |         | 64       | 36       |       | 44       | 56       |       | 61.53846 | 38.46154 |       | 46.15385 | 53.84615 |       |
| Radiotherapy  | No      | 6        | 6        | 0.341 | 5        | 7        | 0.357 | 8        | 4        | 0.734 | 5        | 7        | 0.54  |
|               |         | 50       | 50       |       | 41.66667 | 58.33333 |       | 66.66667 | 33.33333 |       | 41.66667 | 58.33333 |       |
|               | Yes     | 40       | 21       |       | 35       | 26       |       | 41       | 16       |       | 30       | 27       |       |
|               |         | 65.57377 | 34.42623 |       | 57.37705 | 42.62295 |       | 71.92982 | 28.07018 |       | 52.63158 | 47.36842 |       |
| Anatomic site | Lip     | 2        | 1        | 1     | 0        | 3        | 0.154 | 2        | 1        | 0.111 | 0        | 3        | 0.044 |
|               |         | 66.66667 | 33.33333 |       | 0        | 100      |       | 66.66667 | 33.33333 |       | 0        | 100      |       |
|               | Toungue | 35       | 24       |       | 34       | 25       |       | 30       | 24       |       | 25       | 29       |       |
|               |         | 59.32203 | 40.67797 |       | 57.62712 | 42.37288 |       | 55.55556 | 44.44444 |       | 46.2963  | 53.7037  |       |
|               | Other   | 22       | 15       |       | 19       | 18       |       | 27       | 8        |       | 22       | 13       |       |
|               |         | 59.45946 | 40.54054 |       | 51.35135 | 48.64865 |       | 77.14286 | 22.85714 |       | 62.85714 | 37.14286 |       |

## HOX genes and oral squamous cell carcinoma

**Supplementary Table 2.** Correlation between nuclear or cytoplasmic HOXB13 expression and main clinical features in deep and superficial margin of the lesion

| Crosstabs                |             | HOXB13 Deep nuclear expres-<br>sion |             | P<br>value  | HOXB13 Deep cytoplasmic<br>expression |             | P<br>value  | HOXB13 Superficial<br>nuclear expression |          | P<br>value | HOXB13 Superficial<br>cytoplasmic expression |          | P<br>value |          |          |
|--------------------------|-------------|-------------------------------------|-------------|-------------|---------------------------------------|-------------|-------------|------------------------------------------|----------|------------|----------------------------------------------|----------|------------|----------|----------|
|                          |             | ≤30                                 | 31+         |             | ≤0                                    | 1+          |             | ≤30                                      | 31+      |            | ≤0                                           | 1+       |            |          |          |
| Median ex-<br>pression   |             | ≤30                                 | 31+         |             | ≤0                                    | 1+          |             | ≤30                                      | 31+      |            | ≤0                                           | 1+       |            |          |          |
| Grading                  | G1          | 11                                  | 8           | 0.383       | 14                                    | 5           | 1           | 10                                       | 10       | 0.623      | 13                                           | 6        | 0.544      |          |          |
|                          |             | 57.89473684                         | 42.10526316 |             | 73.68421053                           | 26.31578947 |             | 52.63158                                 | 47.36842 |            | 68.42105                                     | 31.57895 |            |          |          |
|                          | G2          | 34                                  | 26          | 56.66666667 | 43                                    | 17          | 71.66666667 | 34                                       | 19       | 65.38462   | 28                                           | 24       | 34.61538   | 53.84615 | 46.15385 |
|                          |             | 56.66666667                         | 43.33333333 |             | 71.66666667                           | 28.33333333 |             | 65.38462                                 | 34.61538 |            | 53.84615                                     | 46.15385 |            |          |          |
|                          | G3          | 11                                  | 16          | 40.74074074 | 19                                    | 8           | 70.37037037 | 17                                       | 11       | 60.71429   | 16                                           | 12       | 39.28571   | 57.14286 | 42.85714 |
|                          |             | 40.74074074                         | 59.25925926 |             | 70.37037037                           | 29.62962963 |             | 60.71429                                 | 39.28571 |            | 57.14286                                     | 42.85714 |            |          |          |
| Lymphonode<br>metastasis | N0          | 29                                  | 21          | 0.329       | 36                                    | 14          | 1           | 26                                       | 19       | 0.54       | 27                                           | 18       | 0.83       |          |          |
|                          |             | 58                                  | 42          |             | 72                                    | 28          |             | 57.77778                                 | 42.22222 |            | 60                                           | 40       |            |          |          |
|                          | N2+         | 26                                  | 29          | 47.27273    | 39                                    | 16          | 70.90909    | 34                                       | 19       | 64.15094   | 30                                           | 23       | 35.84906   | 56.60377 | 43.39623 |
|                          |             | 47.27273                            | 52.72727    |             | 70.90909                              | 29.09091    |             | 64.15094                                 | 35.84906 |            | 56.60377                                     | 43.39623 |            |          |          |
| Stage                    | I           | 7                                   | 4           | 0.426       | 9                                     | 2           | 0.319       | 5                                        | 5        | 0.816      | 7                                            | 3        | 0.477      |          |          |
|                          |             | 63.63636364                         | 36.36363636 |             | 81.81818                              | 18.18182    |             | 50                                       | 50       |            | 70                                           | 30       |            |          |          |
|                          | II          | 17                                  | 11          | 60.71428571 | 19                                    | 9           | 67.85714    | 14                                       | 8        | 63.63636   | 14                                           | 8        | 36.36364   | 63.63636 | 36.36364 |
|                          |             | 60.71428571                         | 39.28571429 |             | 67.85714                              | 32.14286    |             | 63.63636                                 | 36.36364 |            | 63.63636                                     | 36.36364 |            |          |          |
|                          | III         | 10                                  | 15          | 53.48837209 | 21                                    | 4           | 65.11628    | 14                                       | 10       | 65.11628   | 15                                           | 9        | 34.88372   | 48.83721 | 51.16279 |
|                          |             | 53.48837209                         | 46.51162791 |             | 65.11628                              | 34.88372    |             | 65.11628                                 | 34.88372 |            | 48.83721                                     | 51.16279 |            |          |          |
| IV                       | 40          | 60                                  | 55.55555556 | 84          | 16                                    | 83.33333    | 58.33333    | 41.66667                                 | 62.7907  | 62.5       | 37.5                                         | 37.2093  | 62.7907    | 37.2093  |          |
|                          | 57.14285714 | 42.85714286                         |             | 71.42857    | 28.57143                              |             | 62.7907     | 37.2093                                  |          | 62.7907    | 37.2093                                      |          |            |          |          |
| T                        | 1           | 10                                  | 8           | 0.624       | 15                                    | 3           | 0.599       | 9                                        | 7        | 0.915      | 11                                           | 5        | 0.399      |          |          |
|                          |             | 55.55555556                         | 44.44444444 |             | 83.33333                              | 16.66667    |             | 56.25                                    | 43.75    |            | 68.75                                        | 31.25    |            |          |          |
|                          | 2           | 28                                  | 21          | 57.14285714 | 35                                    | 14          | 71.42857    | 27                                       | 16       | 62.7907    | 27                                           | 16       | 37.2093    | 62.7907  | 37.2093  |
|                          |             | 57.14285714                         | 42.85714286 |             | 71.42857                              | 28.57143    |             | 62.7907                                  | 37.2093  |            | 62.7907                                      | 37.2093  |            |          |          |
|                          | 3           | 7                                   | 11          | 38.88888889 | 13                                    | 5           | 72.22222    | 11                                       | 8        | 57.89474   | 9                                            | 10       | 42.10526   | 47.36842 | 52.63158 |
|                          |             | 38.88888889                         | 61.11111111 |             | 72.22222                              | 27.77778    |             | 57.89474                                 | 42.10526 |            | 47.36842                                     | 52.63158 |            |          |          |
| 4                        | 12          | 10                                  | 54.54545455 | 14          | 8                                     | 63.63636    | 14          | 7                                        | 66.66667 | 10         | 11                                           | 33.33333 | 47.61905   | 52.38095 |          |
|                          | 54.54545455 | 45.45454545                         |             | 63.63636    | 36.36364                              |             | 66.66667    | 33.33333                                 |          | 47.61905   | 52.38095                                     |          |            |          |          |
| Gender                   | F           | 18                                  | 13          | 0.67        | 24                                    | 7           | 0.484       | 19                                       | 10       | 0.656      | 15                                           | 14       | 0.506      |          |          |
|                          |             | 58.06451613                         | 41.93548387 |             | 77.41935                              | 22.58065    |             | 65.51724                                 | 34.48276 |            | 51.72414                                     | 48.27586 |            |          |          |
|                          | M           | 39                                  | 37          | 51.31578947 | 53                                    | 23          | 69.73684    | 42                                       | 28       | 60         | 42                                           | 28       | 40         | 60       | 40       |
|                          |             | 51.31578947                         | 48.68421053 |             | 69.73684                              | 30.26316    |             | 60                                       | 40       |            | 60                                           | 40       |            |          |          |

### HOX genes and oral squamous cell carcinoma

|               |         |             |             |       |             |             |       |          |          |       |          |          |       |
|---------------|---------|-------------|-------------|-------|-------------|-------------|-------|----------|----------|-------|----------|----------|-------|
| Age           | <68     | 35          | 22          | 0.84  | 43          | 14          | 0.549 | 36       | 15       | 0.066 | 28       | 23       | 0.685 |
|               |         | 61.40350877 | 38.59649123 |       | 75.4386     | 24.5614     |       | 70.58824 | 29.41176 |       | 54.90196 | 45.09804 |       |
|               | >68     | 22          | 28          |       | 34          | 16          |       | 25       | 23       |       | 29       | 19       |       |
|               |         | 44          | 56          |       | 68          | 32          |       | 52.08333 | 47.91667 |       | 60.41667 | 39.58333 |       |
| Chemotherapy  | No      | 31          | 21          | 0.473 | 38          | 14          | 0.5   | 25       | 19       | 0.458 | 27       | 17       | 0.234 |
|               |         | 59.61538462 | 40.38461538 |       | 73.07692308 | 26.92307692 |       | 56.81818 | 43.18182 |       | 61.36364 | 38.63636 |       |
|               | Yes     | 13          | 13          |       | 17          | 9           |       | 19       | 9        |       | 13       | 15       |       |
|               |         | 50          | 50          |       | 65.38461538 | 34.61538462 |       | 67.85714 | 32.14286 |       | 46.42857 | 53.57143 |       |
| Radiotherapy  | No      | 8           | 8           | 0.584 | 11          | 5           | 0.599 | 4        | 9        | 0.025 | 6        | 7        | 0.543 |
|               |         | 50          | 50          |       | 68.75       | 31.25       |       | 30.76923 | 69.23077 |       | 46.15385 | 53.84615 |       |
|               | Yes     | 36          | 26          |       | 44          | 18          |       | 40       | 19       |       | 34       | 25       |       |
|               |         | 58.06451613 | 41.93548387 |       | 70.96774194 | 29.03225806 |       | 67.79661 | 32.20339 |       | 57.62712 | 42.37288 |       |
| Anatomic site | Lip     | 2           | 2           | 0.608 | 2           | 2           | 0.277 | 1        | 3        | 0.258 | 2        | 2        | 0.157 |
|               |         | 50          | 50          |       | 50          | 50          |       | 25       | 75       |       | 50       | 50       |       |
|               | Toungue | 32          | 33          |       | 50          | 15          |       | 35       | 23       |       | 38       | 20       |       |
|               |         | 49.23076923 | 50.76923077 |       | 76.92307692 | 23.07692308 |       | 60.34483 | 39.65517 |       | 65.51724 | 34.48276 |       |
|               | Other   | 23          | 15          |       | 25          | 13          |       | 25       | 12       |       | 17       | 20       |       |
|               |         | 60.52631579 | 39.47368421 |       | 65.78947368 | 34.21052632 |       | 67.56757 | 32.43243 |       | 45.94595 | 54.05405 |       |

## HOX genes and oral squamous cell carcinoma

**Supplementary Table 3.** Correlation between nuclear or cytoplasmic HOXC13 expression and main clinical features in deep and superficial margin of the lesion

| Crosstabs             |     | HOXC13 Deep nuclear expression |          | P value  | HOXC13 Deep cytoplasmic expression |          | P value  | HOXC13 Superficial nuclear expression |          | P value  | HOXC13 Superficial cytoplasmic expression |          | P value |
|-----------------------|-----|--------------------------------|----------|----------|------------------------------------|----------|----------|---------------------------------------|----------|----------|-------------------------------------------|----------|---------|
|                       |     | ≤10                            | 11+      |          | ≤10                                | 11+      |          | ≤10                                   | 11+      |          | ≤10                                       | 11+      |         |
| Grading               | G1  | 11                             | 9        | 0.892    | 15                                 | 5        | 0.896    | 9                                     | 10       | 0.738    | 13                                        | 6        | 0.67    |
|                       |     | 55                             | 45       |          | 75                                 | 25       |          | 47.36842                              | 52.63158 |          | 68.42105                                  | 31.57895 |         |
|                       | G2  | 34                             | 23       | 59.64912 | 40.35088                           | 78.94737 | 21.05263 | 55.31915                              | 44.68085 | 78.7234  | 21.2766                                   |          |         |
|                       |     | 56                             | 44       |          | 80                                 | 20       | 46.42857 | 53.57143                              | 71.42857 |          | 28.57143                                  |          |         |
| Lymphonode metastasis | N0  | 24                             | 24       | 0.164    | 37                                 | 11       | 0.814    | 23                                    | 20       | 0.679    | 30                                        | 13       | 0.477   |
|                       |     | 50                             | 50       |          | 77.08333                           | 22.91667 |          | 53.48837                              | 46.51163 |          | 69.76744                                  | 30.23256 |         |
|                       | N+  | 34                             | 19       | 64.15094 | 35.84906                           | 79.24528 | 20.75472 | 48                                    | 52       | 78       | 22                                        |          |         |
|                       |     | 56                             | 44       |          | 80                                 | 20       | 46.42857 | 53.57143                              | 71.42857 |          | 28.57143                                  |          |         |
| STAGE                 | I   | 5                              | 5        | 0.408    | 8                                  | 2        | 0.132    | 7                                     | 4        | 0.833    | 8                                         | 3        | 0.553   |
|                       |     | 50                             | 50       |          | 80                                 | 20       |          | 63.63636                              | 36.36364 |          | 72.72727                                  | 27.27273 |         |
|                       | II  | 14                             | 12       | 53.84615 | 46.15385                           | 65.38462 | 34.61538 | 50                                    | 50       | 63.63636 | 36.36364                                  |          |         |
|                       |     | 50                             | 50       |          | 92.30769                           | 7.692308 | 45.45455 | 54.54545                              | 81.81818 |          | 18.18182                                  |          |         |
|                       | III | 13                             | 13       | 68.29268 | 31.70732                           | 78.04878 | 21.95122 | 52.5                                  | 47.5     | 77.5     | 22.5                                      |          |         |
|                       |     | 50                             | 50       |          | 92.30769                           | 7.692308 | 45.45455 | 54.54545                              | 81.81818 |          | 18.18182                                  |          |         |
|                       | IV  | 28                             | 13       | 64.70588 | 35.29412                           | 82.35294 | 17.64706 | 72.22222                              | 27.77778 | 77.77778 | 22.22222                                  |          |         |
|                       |     | 26                             | 19       |          | 33                                 | 12       | 18       | 22                                    | 29       |          | 11                                        |          |         |
| T                     | 1   | 11                             | 6        | 0.357    | 14                                 | 3        | 0.738    | 13                                    | 5        | 0.161    | 14                                        | 4        | 0.974   |
|                       |     | 57.77778                       | 42.22222 |          | 73.33333                           | 26.66667 |          | 45                                    | 55       |          | 72.5                                      | 27.5     |         |
|                       | 2   | 8                              | 11       | 42.10526 | 57.89474                           | 84.21053 | 15.78947 | 38.88889                              | 61.11111 | 77.77778 | 22.22222                                  |          |         |
|                       |     | 42.10526                       | 57.89474 |          | 84.21053                           | 15.78947 | 38.88889 | 61.11111                              | 77.77778 |          | 22.22222                                  |          |         |
|                       | 3   | 8                              | 11       | 68.18182 | 31.81818                           | 81.81818 | 18.18182 | 57.89474                              | 42.10526 | 73.68421 | 26.31579                                  |          |         |
|                       |     | 15                             | 7        |          | 18                                 | 4        | 11       | 8                                     | 14       |          | 5                                         |          |         |
| Gender                | F   | 17                             | 12       | 1        | 23                                 | 6        | 1        | 16                                    | 9        | 0.168    | 20                                        | 5        | 0.597   |
|                       |     | 58.62069                       | 41.37931 |          | 79.31034                           | 20.68966 |          | 64                                    | 36       |          | 80                                        | 20       |         |
|                       | M   | 43                             | 31       | 58.10811 | 41.89189                           | 78.37838 | 21.62162 | 47.14286                              | 52.85714 | 72.85714 | 27.14286                                  |          |         |
|                       |     | 58.10811                       | 41.89189 |          | 78.37838                           | 21.62162 | 47.14286 | 52.85714                              | 72.85714 |          | 27.14286                                  |          |         |
| Age                   | <68 | 39                             | 16       | 0.009    | 45                                 | 10       | 0.473    | 31                                    | 22       | 0.151    | 45                                        | 8        | 0.017   |
|                       |     | 70.90909                       | 29.09091 |          | 81.81818                           | 18.18182 |          | 58.49057                              | 41.50943 |          | 84.90566                                  | 15.09434 |         |
|                       | >68 | 21                             | 27       | 43.75    | 56.25                              | 75       | 25       | 42.85714                              | 57.14286 | 61.90476 | 38.09524                                  |          |         |
|                       |     | 43.75                          | 56.25    |          | 75                                 | 25       | 42.85714 | 57.14286                              | 61.90476 |          | 38.09524                                  |          |         |

## HOX genes and oral squamous cell carcinoma

|               |         |          |          |       |          |          |       |          |          |       |          |          |       |
|---------------|---------|----------|----------|-------|----------|----------|-------|----------|----------|-------|----------|----------|-------|
| Chemotherapy  | No      | 27       | 23       | 1     | 37       | 13       | 1     | 24       | 22       | 0.806 | 32       | 14       | 0.791 |
|               |         | 54       | 46       |       | 74       | 26       |       | 52.17391 | 47.82609 |       | 69.56522 | 30.43478 |       |
|               | Yes     | 14       | 11       |       | 18       | 7        |       | 12       | 13       |       | 16       | 9        |       |
|               |         | 56       | 44       |       | 72       | 28       |       | 48       | 52       |       | 64       | 36       |       |
| Radiotherapy  | No      | 7        | 7        | 0.771 | 9        | 5        | 0.504 | 7        | 6        | 1     | 7        | 6        | 0.327 |
|               |         | 50       | 50       |       | 64.28571 | 35.71429 |       | 53.84615 | 46.15385 |       | 53.84615 | 46.15385 |       |
|               | yes     | 34       | 27       |       | 46       | 15       |       | 29       | 29       |       | 41       | 17       |       |
|               |         | 55.7377  | 44.2623  |       | 75.40984 | 24.59016 |       | 50       | 50       |       | 70.68966 | 29.31034 |       |
| Anatomic site | Lip     | 1        | 3        | 0.373 | 2        | 2        | 0.374 | 2        | 2        | 1     | 1        | 3        | 0.071 |
|               |         | 25       | 75       |       | 50       | 50       |       | 50       | 50       |       | 25       | 75       |       |
|               | Toungue | 38       | 24       |       | 50       | 12       |       | 29       | 28       |       | 44       | 13       |       |
|               |         | 61.29032 | 38.70968 |       | 80.64516 | 19.35484 |       | 50.87719 | 49.12281 |       | 77.19298 | 22.80702 |       |
|               | Other   | 21       | 16       |       | 29       | 8        |       | 18       | 16       |       | 26       | 8        |       |
|               |         | 56.75676 | 43.24324 |       | 78.37838 | 21.62162 |       | 52.94118 | 47.05882 |       | 76.47059 | 23.52941 |       |

## HOX genes and oral squamous cell carcinoma

**Supplementary Table 4.** Correlation between nuclear or cytoplasmic HOXD13 expression and main clinical features in deep and superficial margin of the lesion

| Crosstabs             | HOXD13 Deep nuclear expression |          | P value  | HOXD13 Deep cytoplasmic expression |          | P value  | HOXD13 Superficial nuclear expression |          | P value  | HOXD13 Superficial cytoplasmic expression |          | P value |  |          |          |
|-----------------------|--------------------------------|----------|----------|------------------------------------|----------|----------|---------------------------------------|----------|----------|-------------------------------------------|----------|---------|--|----------|----------|
|                       | ≤15                            | 16+      |          | ≤0                                 | 1+       |          | ≤15                                   | 16+      |          | ≤0                                        | 1+       |         |  |          |          |
| Grading               | G1                             | 7        | 1        | 15                                 | 1        | 0.163    | 7                                     | 8        | 0.869    | 13                                        | 2        | 0.216   |  |          |          |
|                       |                                | 43.75    |          |                                    | 93.75    |          | 6.25                                  |          |          | 46.66667                                  | 53.33333 |         |  | 86.66667 | 13.33333 |
|                       | G2                             | 24       |          |                                    | 37       |          | 16                                    |          |          | 20                                        | 20       |         |  | 25       | 15       |
|                       |                                | 45.28302 |          | 69.81132                           | 30.18868 |          | 50                                    | 50       |          | 62.5                                      | 37.5     |         |  |          |          |
|                       | G3                             | 10       |          | 16                                 | 6        |          | 13                                    | 10       |          | 16                                        | 7        |         |  |          |          |
|                       |                                | 45.45455 |          | 72.72727                           | 27.27273 |          | 56.52174                              | 43.47826 |          | 69.56522                                  | 30.43478 |         |  |          |          |
| Lymphonode metastasis | N0                             | 20       | 0.525    | 32                                 | 9        | 0.633    | 17                                    | 18       | 0.651    | 25                                        | 10       | 1       |  |          |          |
|                       |                                | 48.78049 |          |                                    | 78.04878 |          | 21.95122                              |          |          | 48.57143                                  | 51.42857 |         |  | 71.42857 | 28.57143 |
|                       | N+                             | 20       |          |                                    | 36       |          | 13                                    |          |          | 23                                        | 19       |         |  | 29       | 13       |
|                       |                                | 40.81633 |          | 73.46939                           | 26.53061 |          | 54.7619                               | 45.2381  |          | 69.04762                                  | 30.95238 |         |  |          |          |
| STAGE                 | I                              | 6        | 0.26     | 8                                  | 1        | 0.038    | 5                                     | 4        | 0.962    | 7                                         | 2        | 0.369   |  |          |          |
|                       |                                | 66.66667 |          |                                    | 88.88889 |          | 11.11111                              |          |          | 55.55556                                  | 44.44444 |         |  | 77.77778 | 22.22222 |
|                       | II                             | 7        |          |                                    | 18       |          | 4                                     |          |          | 9                                         | 7        |         |  | 13       | 3        |
|                       |                                | 31.81818 |          |                                    | 81.81818 |          | 18.18182                              |          |          | 56.25                                     | 43.75    |         |  | 81.25    | 18.75    |
|                       | III                            | 13       |          |                                    | 21       |          | 3                                     |          |          | 9                                         | 10       |         |  | 14       | 5        |
|                       | 54.16667                       |          | 87.5     | 12.5                               |          | 47.36842 | 52.63158                              |          | 73.68421 | 26.31579                                  |          |         |  |          |          |
|                       | IV                             | 16       |          | 22                                 | 15       |          | 17                                    | 17       |          | 20                                        | 14       |         |  |          |          |
|                       |                                | 43.24324 |          | 59.45946                           | 40.54054 |          | 50                                    | 50       |          | 58.82353                                  | 41.17647 |         |  |          |          |
| T                     | 1                              | 7        | 0.709    | 14                                 | 2        | 0.001    | 8                                     | 6        | 0.477    | 9                                         | 5        | 0.01    |  |          |          |
|                       |                                | 43.75    |          |                                    | 87.5     |          | 12.5                                  |          |          | 57.14286                                  | 42.85714 |         |  | 64.28571 | 35.71429 |
|                       | 2                              | 16       |          |                                    | 32       |          | 8                                     |          |          | 19                                        | 13       |         |  | 27       | 5        |
|                       |                                | 40       |          |                                    | 80       |          | 20                                    |          |          | 59.375                                    | 40.625   |         |  | 84.375   | 15.625   |
|                       | 3                              | 10       |          |                                    | 16       |          | 2                                     |          |          | 8                                         | 10       |         |  | 13       | 5        |
|                       | 55.55556                       |          | 88.88889 | 11.11111                           |          | 44.44444 | 55.55556                              |          | 72.22222 | 27.77778                                  |          |         |  |          |          |
|                       | 4                              | 9        |          | 7                                  | 11       |          | 5                                     | 9        |          | 5                                         | 9        |         |  |          |          |
|                       |                                | 50       |          | 38.88889                           | 61.11111 |          | 35.71429                              | 64.28571 |          | 35.71429                                  | 64.28571 |         |  |          |          |
| Gender                | F                              | 10       | 0.487    | 15                                 | 11       | 0.03     | 10                                    | 9        | 1        | 10                                        | 9        | 0.09    |  |          |          |
|                       |                                | 38.46154 |          |                                    | 57.69231 |          | 42.30769                              |          |          | 52.63158                                  | 47.36842 |         |  | 52.63158 | 47.36842 |
|                       | M                              | 32       |          |                                    | 54       |          | 12                                    |          |          | 30                                        | 29       |         |  | 44       | 15       |
|                       |                                | 48.48485 |          | 81.81818                           | 18.18182 |          | 50.84746                              | 49.15254 |          | 74.57627                                  | 25.42373 |         |  |          |          |

### HOX genes and oral squamous cell carcinoma

|               |        |          |       |          |    |       |          |    |       |          |    |       |
|---------------|--------|----------|-------|----------|----|-------|----------|----|-------|----------|----|-------|
| Age           | <68    | 24       | 0.304 | 34       | 13 | 0.633 | 15       | 26 | 0.007 | 26       | 15 | 0.327 |
|               |        | 51.06383 |       | 72.34043 |    |       | 27.65957 |    |       | 36.58537 |    |       |
|               | >68    | 18       |       | 35       | 10 |       | 25       | 12 |       | 28       | 9  |       |
|               |        | 40       |       | 77.77778 |    |       | 22.22222 |    |       | 67.56757 |    |       |
| Chemotherapy  | No     | 18       | 0.613 | 35       | 9  | 0.027 | 23       | 16 | 0.092 | 27       | 12 | 0.557 |
|               |        | 40.90909 |       | 79.54545 |    |       | 20.45455 |    |       | 58.97436 |    |       |
|               | Yes    | 11       |       | 12       | 11 |       | 6        | 13 |       | 11       | 8  |       |
|               |        | 47.82609 |       | 52.17391 |    |       | 47.82609 |    |       | 31.57895 |    |       |
| Radiotherapy  | No     | 6        | 0.75  | 10       | 2  | 0.324 | 4        | 6  | 0.73  | 9        | 1  | 0.141 |
|               |        | 50       |       | 83.33333 |    |       | 16.66667 |    |       | 40       |    |       |
|               | Yes    | 23       |       | 37       | 18 |       | 25       | 23 |       | 29       | 19 |       |
|               |        | 41.81818 |       | 67.27273 |    |       | 32.72727 |    |       | 52.08333 |    |       |
| Anatomic site | Lip    | 2        | 0.383 | 3        | 1  | 0.915 | 2        | 2  | 0.862 | 3        | 1  | 0.915 |
|               |        | 50       |       | 75       |    |       | 25       |    |       | 50       |    |       |
|               | Tongue | 27       |       | 40       | 12 |       | 22       | 23 |       | 32       | 13 |       |
|               |        | 51.92308 |       | 76.92308 |    |       | 23.07692 |    |       | 48.88889 |    |       |
|               | Other  | 13       |       | 26       | 10 |       | 16       | 13 |       | 19       | 10 |       |
|               |        | 36.11111 |       | 72.22222 |    |       | 27.77778 |    |       | 55.17241 |    |       |
